# Supplementary material for: Synthesis, structure and property of cobalt(II) complexes with 3,5-di(1H-imidazol-1-yl)benzoic acid
Source: Royal Society of Chemistry journal article supplement (doi:10.1039/b822394g), 2009-01-01
Supplement: b822394g.pdf [file b822394g.pdf]

*Supporting Information:*

**Synthesis, Structure and Property of Cobalt(II) Complexes with  
3,5-Di(1H-imidazol-1-yl)benzoic Acid**

**Zhi Su,<sup>a</sup> Zheng-Shuai Bai,<sup>a</sup> Jing Xu,<sup>a</sup> Taka-aki Okamura,<sup>b</sup> Guang-Xiang Liu,<sup>a</sup> Qian  
Chu,<sup>a</sup> Xiao-Feng Wang,<sup>a</sup> Wei-Yin Sun\*<sup>a</sup> and Norikazu Ueyama<sup>b</sup>**

<sup>a</sup> *Coordination Chemistry Institute, State Key Laboratory of Coordination Chemistry, School  
of Chemistry and Chemical Engineering, Nanjing National Laboratory of Microstructures,  
Nanjing University, Nanjing 210093, China*

<sup>b</sup> *Department of Macromolecular Science, Graduate School of Science, Osaka University,  
Toyonaka, Osaka 560-0043, Japan*

**Table S1** Hydrogen bonding distances/ Å and angle/ ° for complex **2**

|                |           |        |
|----------------|-----------|--------|
| O3-H10...O1#1  | 2.763(4)  | 160(4) |
| O3-H11...O12#1 | 2.857(7)  | 156(4) |
| O4-H12...O2#2  | 3.222(4)  | 136(4) |
| O4-H12...O3#3  | 3.239(4)  | 151(4) |
| O4-H13...O24#3 | 3.253(12) | 142(4) |
| C2-H1...O22#4  | 3.150(10) | 122    |
| C2-H1...O22#5  | 3.108(10) | 114    |
| C11-H4...O22#4 | 3.437(10) | 162    |

---

|                 |           |     |
|-----------------|-----------|-----|
| C11-H4...O24#5  | 3.436(14) | 150 |
| C13-H6...O23#6  | 3.162(15) | 136 |
| C13-H6...O21 #1 | 3.286(11) | 151 |
| C31-H7...O11#4  | 3.223(8)  | 177 |
| C33-H9...O21    | 3.416(11) | 170 |
| C33-H9...O23#7  | 3.285(15) | 172 |

---

Symmetry transformations used to generate equivalent atoms:#1  $1/2-x$ ,  $1/2+y$ ,  $1-z$ , #2  $x$ ,  $y$ ,  $-1+z$ , #3  $1/2-x$ ,  $1/2+y$ ,  $-z$ , #4  $x$ ,  $1+y$ ,  $z$ , #5  $1-x$ ,  $1+y$ ,  $1-z$ , #6  $-1/2+x$ ,  $1/2+y$ ,  $z$ , #7  $1-x$ ,  $y$ ,  $1-z$ .

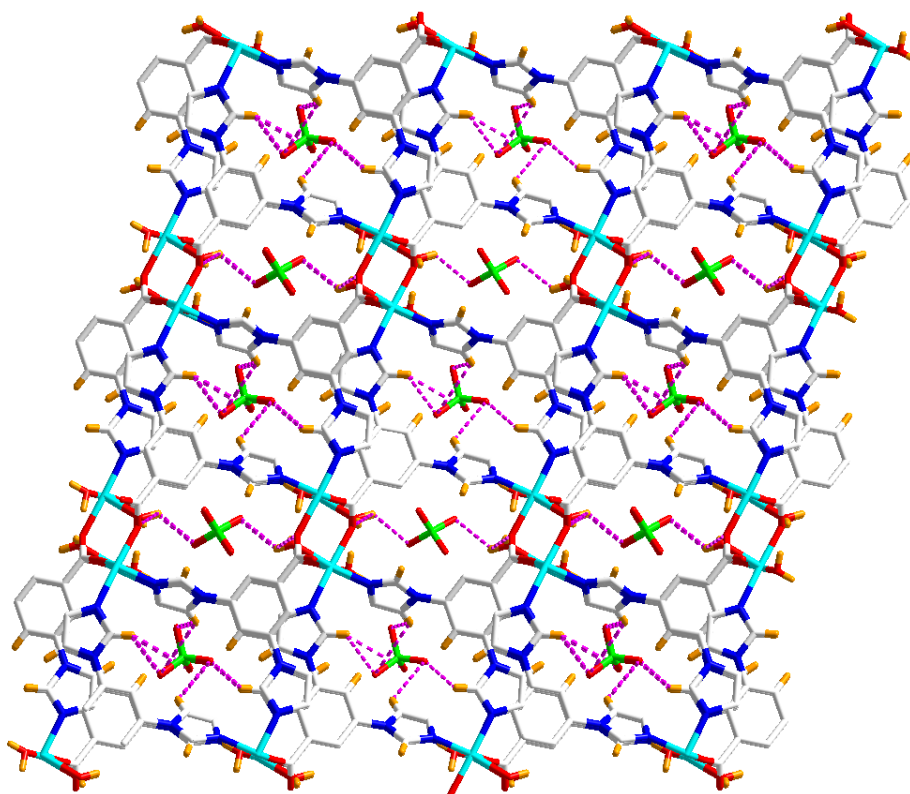

**Figure S1.** View of crystal packing diagram of **2** with perchlorate anions encapsulated inside the 1D tubes. The hydrogen bonds are shown in dash line.

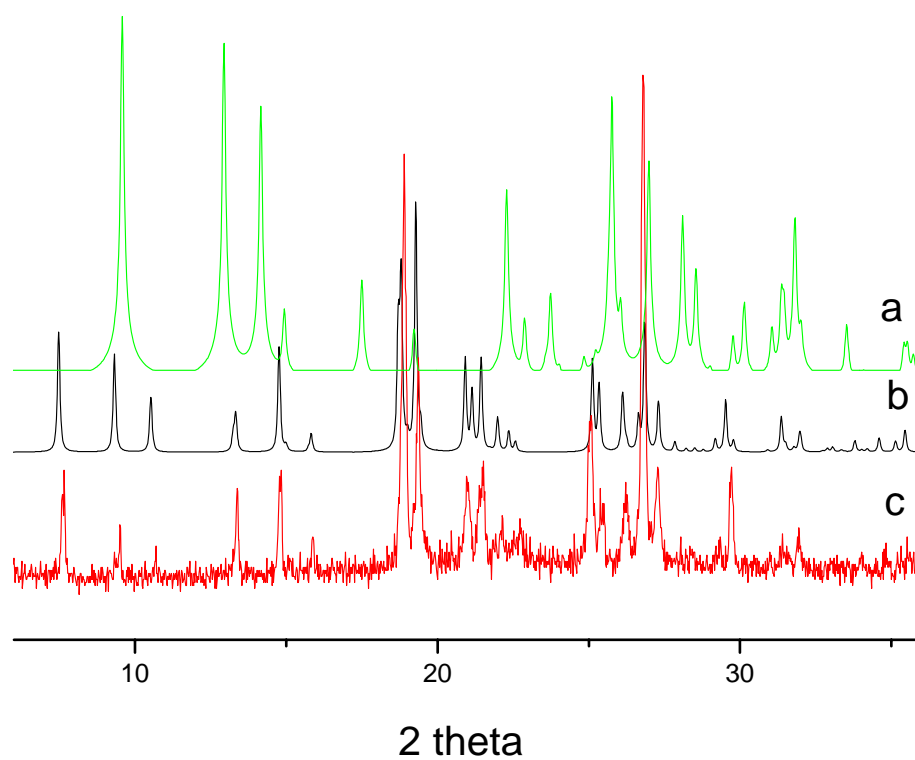

**Figure S2.** XRPD pattern of (a) complex **1**, (b) complex **2**, (c) complex **2** treated with aqueous solution of  $\text{NaNO}_3$ .
